# Supplementary material
Source: MDPI journal article supplement (https://www.mdpi.com/2073-4441/15/13/2369)

# RÉGIMEN HÍDRICO ACTUAL Y MODELIZACIÓN DURANTE EL S.XXI EN LA LAGUNA DE SANTA OLALLA (PN DOÑANA)

Trabajo fin de máster

Máster universitario en cambio climático, carbono y recursos hídricos.  
Curso 2021-2022 (UNIVERSIDAD PABLO DE OLAVIDE)

Autora: María Faucheux Vega  
Tutor: Miguel Rodríguez Rodríguez

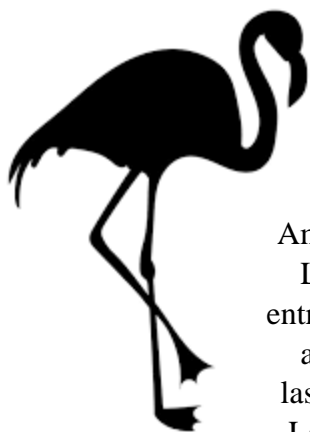

## Doñana en abril

Amanece en la marisma.  
 Leve brisa se levanta  
 entre inmensidades verdes  
 agitando suavemente  
 las hermosas espadañas.  
 La luz asoma a lo lejos  
 sobre las brumas humosas  
 de una apacible mañana.  
 Clareando, el alba blanca.

La primera luz del día  
 tímidamente se asoma  
 tras los lentiscos y enneas.  
 El sol ilumina el agua.  
 La vida vuelve a fluir.  
 ¡El eterno renacer  
 por los campos de Doñana!

De repente... ¡estruendo sordo!  
 ¡Un bando levanta el vuelo!  
 Cien flamencos en el aire,  
 una acuarela de rosas  
 en el denso azul del cielo.

Castañuelas en los lucios.  
 Rosario de verde y agua.  
 Ánsares allá en los juncos  
 deslizándose en silencio  
 por la superficie clara.  
 Graznidos y crotoreos  
 entre carrizo y bayunco.

Sinfonías de la mañana.  
 Bandos de gansos silvestres  
 ocupan todo el espacio.  
 Garzas que levantan vuelo  
 y los patos malvasías  
 silbando un bello cortejo.  
 Paisaje de luz radiante,  
 griteríos y aleteos.

Por las dunas y corrales  
 se escucha el silbo del viento.  
 Sobre un pino retorcido,  
 superviviente de arena,  
 se posa un milano negro.  
 Retumba lejos un trueno,  
 tras las jaras, brama un ciervo.

Aromas que atrapa el viento.  
 Flor de jara, de retama, de romero.  
 Aromas que se enredan en el aire.  
 De jaguarzos y de brezos,  
 de tomillo y de cantuesos.  
 De los narcisos silvestres  
 del borde de los senderos.

Cabalgando contra el polvo  
 se oyen sordos golpeteos.  
 Una manada de yeguas,  
 largas las crines al aire,  
 trotan firmes, poderosas,  
 seguidas de los potrillos  
 buscando el abrevadero.

En los bajos  
 de la playa solitaria  
 retozan dos cervatillos  
 mientras sube la marea.  
 Agua y sol, sol y agua.  
 dunas inmensas de arena.

Junto a verdes matorrales  
 corre veloz una liebre.  
 Tras las rosadas adelfas,  
 rauda, como espíritu fugaz,  
 la sombra de un lince  
 desaparece.

Huellas, rastros miles,  
 de pasos entrelazados.  
 En la blanca arena,  
 en la tierra del sendero,

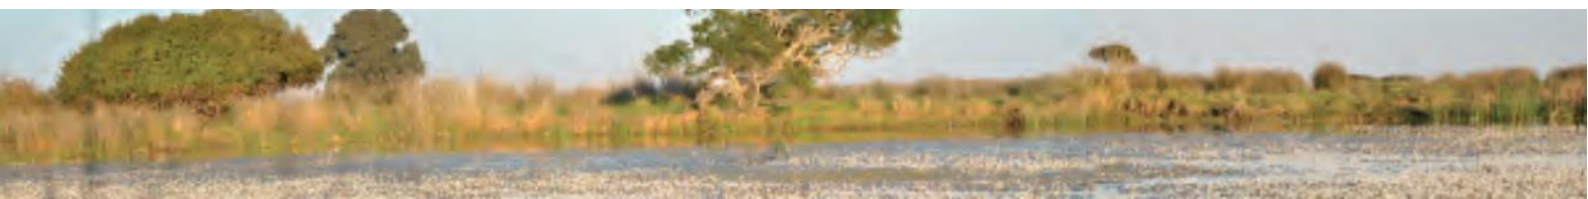

en el barro removido  
del borde de los esteros.

Por el aire transparente  
suenan sonos rocieros,  
la gaita y el tamboril.  
Las carretas sanluqueñas,  
en su camino de vuelta,  
dejan el alma en el coto  
y en el polvo del carril...

¡Arena y viento  
acorralan a los pinos!  
¡Arena y viento!  
Rubio amarillo en el suelo.  
Lavanda, gladiolos, malvas  
en una alfombra de flores.  
¡Arena y viento!  
Azul de lirio en el cielo.  
Bajo los pinos, helechos.

Calor suave de la tarde.  
Frescor húmedo y brillante  
en el bosque de ribera.  
Destellos de sombra y luz.  
Dos jabalíes sestan.  
Mil cantos de ruiseñores  
cubren la densa arboleda.  
Los gamos sacian su sed  
en el borde de los lucios.  
Dorado sol en el agua  
sonriendo entre los juncos.

Los vetustos alcornoques,  
pajareras infinitas,  
perchas henchidas de vida,  
prestan cobijo y asilo  
a espátulas y garcillas.  
Y desde el alto ramaje,  
un halcón peregrino de inmóvil silueta,  
de hermoso plumaje,  
sobre el horizonte pasea su mirada

de ojos profundos, de ojos oscuros...  
Sobre el alcornocal,  
en círculos concéntricos,  
planea majestuoso un águila imperial.

Migraciones, aleteos en el cielo.  
En ángulos, las bandadas  
regresan al dormitorio.  
Cae la tarde por los cotos.  
Arde el cielo hacia poniente.  
Viento tranquilo y en calma.  
Se duerme el sol en el agua  
desparramando belleza  
por las tierras de Doñana.  
La marisma, plena de oro,  
y a lo lejos...  
con perfil resplandeciente  
asoma una ermita blanca.

Las estrellas se derraman...  
Ruido sordo, sigiloso, amortiguado  
de la noche que dormita.  
Ojos brillantes acechan  
en la oscuridad sonora.  
Croar de ranas, potrillos que maman,  
ulular de búhos, grillos, chapoteos.  
Por los acebuches maúlla un mochuelo.  
Temblores de ramas,  
de vida latente.  
Vigilan lechuzas allá en el pinar  
y la luna nueva camina despacio,  
distante y ausente.

Otro día más...  
repitiendo eterno  
el ciclo de vida y el ciclo de muerte...

¡Hermosa Doñana!  
¡Plenitud de vida!  
¡Libre, salvaje, bravía!  
Ruge el mar abierto en la lejanía...

**-María Prieto Sánchez-**

Mayo 2018

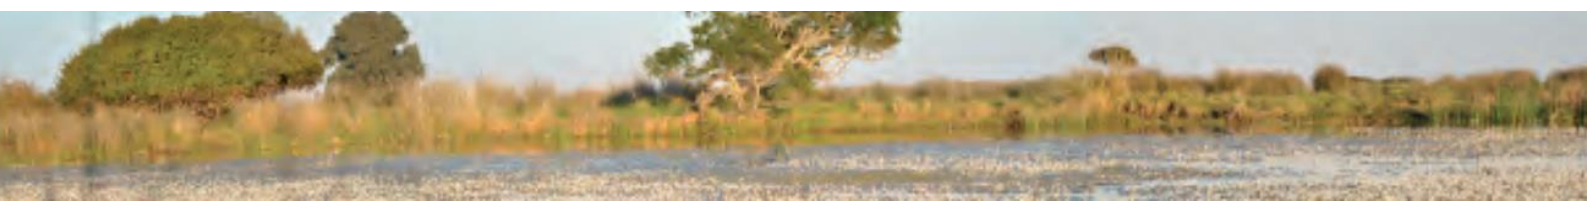

## RESUMEN

En el presente estudio se pretende conocer si la laguna de Santa Olalla, considerada actualmente una de las pocas lagunas con hidropериodo permanente del Parque Nacional de Doñana, verá modificada su dinámica en un futuro. Es decir, se busca conocer si pudieran verse afectados tanto el hidropериodo como la profundidad de ésta, debido al cambio climático, concretamente teniendo presente el escenario de emisión RCP 4,5 del IPCC.

Para llevar a cabo esta investigación se ha requerido analizar la evolución diaria de la profundidad de la laguna durante el periodo 2015-2020, para a continuación, en función a estos datos poder desarrollar un modelo unidimensional que nos permita predecir la situación futura de la laguna. Una vez calibrado y validado el modelo para este periodo, se extrapola al periodo 2030-2060.

Los resultados muestran, a pesar de no tener a día de hoy una tendencia clara del descenso de los niveles de agua y de cambio del hidropериodo de la laguna, que ésta podría efectivamente llegar a secarse durante largos periodos de tiempo, modificando así su dinámica actual.

**Palabras clave:** Parque Nacional de Doñana, laguna de Santa Olalla, cambio climático, régimen hídrico, modelización, evolución del hidropериodo.

## ABSTRACT

This study aims to find out if the Santa Olalla pond, currently considered one of the few ponds with a permanent hydroperiod in the Doñana National Park, will modify its behaviour in the future. In other words, the goal is to find out if both the hydroperiod and its depth could be affected due to climate change, specifically considering the IPCC RCP 4.5 emission scenario.

To carry out this research, it has been necessary to analyse the daily evolution of the depth of the pond during the 2015-2020 period, in order to then, based on these data, be able to develop a one-dimensional model that allows us to predict the future situation of the pond. Once the model has been calibrated and validated for this period, it is extrapolated to the 2030-2060 period.



The results show, despite the fact that today there is no clear trend of lowering the water levels and changing the hydroperiod of the pond, that it could actually dry up for long periods of time, thus modifying its current behaviour.

**Key words:** Doñana National Park, Santa Olalla pond, climate change, water regime, modelling, evolution of the hydroperiod.





## ÍNDICE DE CONTENIDOS

|                                                       |           |
|-------------------------------------------------------|-----------|
| <b>1. INTRODUCCIÓN</b>                                | <b>7</b>  |
| 1.1 Antecedentes                                      | 9         |
| 1.2 Objetivos                                         | 10        |
| 1.3 Zona de estudio                                   | 11        |
| 1.3.1 Características climáticas de la zona de Doñana | 11        |
| 1.3.2 Entorno geológico e hidrogeológico              | 12        |
| 1.3.3 Características de la laguna de Santa Olalla    | 15        |
| <b>2. MATERIALES Y METODOLOGÍA</b>                    | <b>16</b> |
| 2.1 Datos meteorológicos de la laguna de Santa Olalla | 16        |
| 2.2 Cálculo de la esorrentía                          | 17        |
| 2.3 Cálculo de las series reales (2015-2020)          | 17        |
| 2.4 Cálculo de las series futuras (2030-2060)         | 18        |
| 2.4.1 Base datos AdapteCCa                            | 18        |
| 2.4.2 Corrección del BIAS                             | 19        |
| 2.5 Elección del modelo hidrológico                   | 20        |
| <b>3. RESULTADOS Y DISCUSIÓN</b>                      | <b>21</b> |
| 3.1 Evolución real (2015-2020)                        | 21        |
| 3.2 Evolución simulada (2030-2060)                    | 26        |
| <b>4. CONCLUSIONES</b>                                | <b>30</b> |
| <b>5. BIBLIOGRAFÍA</b>                                | <b>31</b> |



## INDICE DE FIGURAS

|                                                                                                                                                                                                                  |    |
|------------------------------------------------------------------------------------------------------------------------------------------------------------------------------------------------------------------|----|
| <b>Figura 1.</b> Masas de agua subterránea del RD 1/2016 .....                                                                                                                                                   | 8  |
| <b>Figura 2.</b> Caracterización geomorfológica del sistema de lagunas de Doñana. Fuente: Diaz-Paniagua.....                                                                                                     | 13 |
| <b>Figura 3.</b> Localización de las lagunas peridunares de Doñana.....                                                                                                                                          | 14 |
| <b>Figura 4.</b> Esquema hidrogeológico del sistema lagunar Dulce-Santa Olalla-Pajas. Fuente: Fernández-Ayuso et al., 2019 .....                                                                                 | 15 |
| <b>Figura 5.</b> Equipo utilizado para medir la evapotranspiración potencial y la evaporación real de la zona de Doñana.....                                                                                     | 16 |
| <b>Figura 6.</b> Medición y descarga de datos de nivel de la laguna (regleta central) y de un piezómetro situado en la orilla oeste de la laguna de Santa Olalla (31/01/2022).....                               | 18 |
| <b>Figura 7.</b> Resultados de la correlación entre los datos reales medidos en la estación de Almonte y los resultados obtenidos por los 16 modelos de simulación durante el periodo histórico considerado..... | 19 |
| <b>Figura 8.</b> Evolución de la lámina de agua de la laguna de Santa Olalla (2015-2021)...                                                                                                                      | 22 |
| <b>Figura 9.</b> Desviación acumulada de precipitaciones medias frente a profundidad de la laguna de Santa Olalla (2015-2021) .....                                                                              | 23 |
| <b>Figura 10.</b> Evolución de la lámina de agua real y de las 3 simulaciones .....                                                                                                                              | 24 |
| <b>Figura 11.</b> Simulaciones futuras (2030-2060) de la evolución de la profundidad de la laguna de Santa Olalla .....                                                                                          | 26 |
| <b>Figura 12.</b> Correlación entre los modelos hidrológicos simulados 1, 2 y 3 y la evolución real de la laguna (2030-2060).....                                                                                | 27 |
| <b>Figura 13.</b> Evolución de la profundidad de la laguna para la simulación escogida (PCR 4.5 - P*3.05+ESC) para el periodo de 2030 al 2060 .....                                                              | 28 |

## ÍNDICE DE TABLAS

|                                                                                         |    |
|-----------------------------------------------------------------------------------------|----|
| Tabla 1. Estadísticos básicos I de las variables hidrometeorológicas (2015-2020) .....  | 24 |
| Tabla 2. Estadísticos básicos II de las variables hidrometeorológicas (2015-2020) ..... | 25 |
| Tabla 3. Estadísticos básicos I de las variables hidrometeorológicas (2030-2060) .....  | 28 |
| Tabla 4. Estadísticos básicos II de las variables hidrometeorológicas (2030-2060) ..... | 29 |



## 1. INTRODUCCIÓN

Los humedales son de vital importancia para la supervivencia humana. Son uno de los entornos más productivos del mundo, y son el origen de diversidad biológica y fuentes de agua y productividad primaria de las que innumerables especies vegetales y animales dependen para subsistir.

Sin embargo, un estudio tras otro demuestra que la superficie y la calidad de los humedales siguen disminuyendo en la mayoría de regiones del mundo y por lo tanto, los servicios de los ecosistemas que los humedales proporcionan a las personas se encuentran en peligro. Concretamente, informes de la Convención Relativa a los Humedales de Importancia Internacional, conocida como Convención Ramsar, afirman que el planeta ha perdido el 35% de sus humedales en los últimos 45 años. Desde 1700, el 85% de estos ecosistemas han desaparecido (De Groot et al., 2006).

La deforestación, la expansión de cultivos y el desarrollo urbano se han convertido en las principales amenazas para estos ecosistemas, considerados esenciales para la lucha contra el cambio climático, ya que, entre otras razones, son capaces de almacenar hasta 50 veces más carbono que las selvas tropicales.

El Parque Nacional de Doñana es un área especialmente conservada en el sur de España, que actualmente está sometida a máximos niveles de protección, y que además durante siglos ha estado dedicada a cotos de caza que han preservado en gran medida sus ecosistemas. Gracias a estos niveles de protección, en su interior se ha preservado un importante sistema de lagunas temporales, formadas anualmente gracias a suaves depresiones del terreno y a la existencia de un sustrato impermeable que permite la permanencia del agua durante periodos anuales y con ello el establecimiento de comunidades animales y vegetales de gran interés, siendo el lugar de reproducción del 40% de las especies de plantas y animales del mundo.

Como típicas lagunas temporales mediterráneas, su inundación se produce con las lluvias otoño-invernales, mientras que la desecación suele ocurrir en verano, produciéndose una enorme variación en cuanto a los patrones de inicio y final de su hidroperiodo anual.

El origen natural de las lagunas, su alta heterogeneidad espacial y temporal, y la gran abundancia, hacen que este sistema de lagunas se pueda considerar único en Europa y de gran interés (Díaz-Paniagua & Aguilar Alba, 2015).





Tal y como se determina en el último informe del estado de los acuíferos de Doñana, elaborado por la Confederación Hidrográfica del Guadalquivir (Hidrográfica et al., 2021), existen cinco masas de agua subterránea: La de Almonte, que forma parte del acuífero detrítico libre no incluido en el ámbito del Plan de la Corona Forestal del Norte de Doñana; la de las Marismas que forma parte del acuífero confinado no incluido en el Parque Nacional de Doñana; aquella de las Marismas de Doñana, que son parte del acuífero confinado incluido en el Parque Nacional de Doñana; las del manto eólico de Doñana, que supone el frente costero y conjunto de arenas eólicas hasta las masas de agua de La Rocina y Marismas de Doñana; y finalmente la masa de agua de La Rocina, que forma parte del acuífero detrítico libre incluido en el ámbito del Plan de la Corona Forestal del Norte de Doñana.

De estas cinco masas de agua, tres de ellas están en un estado cuantitativo “malo” (Almonte, Marismas y La Rocina) y otras dos masas de agua en estado cuantitativo “bueno”, lo que quiere decir que es una zona con un estado piezométrico acorde con la climatología.

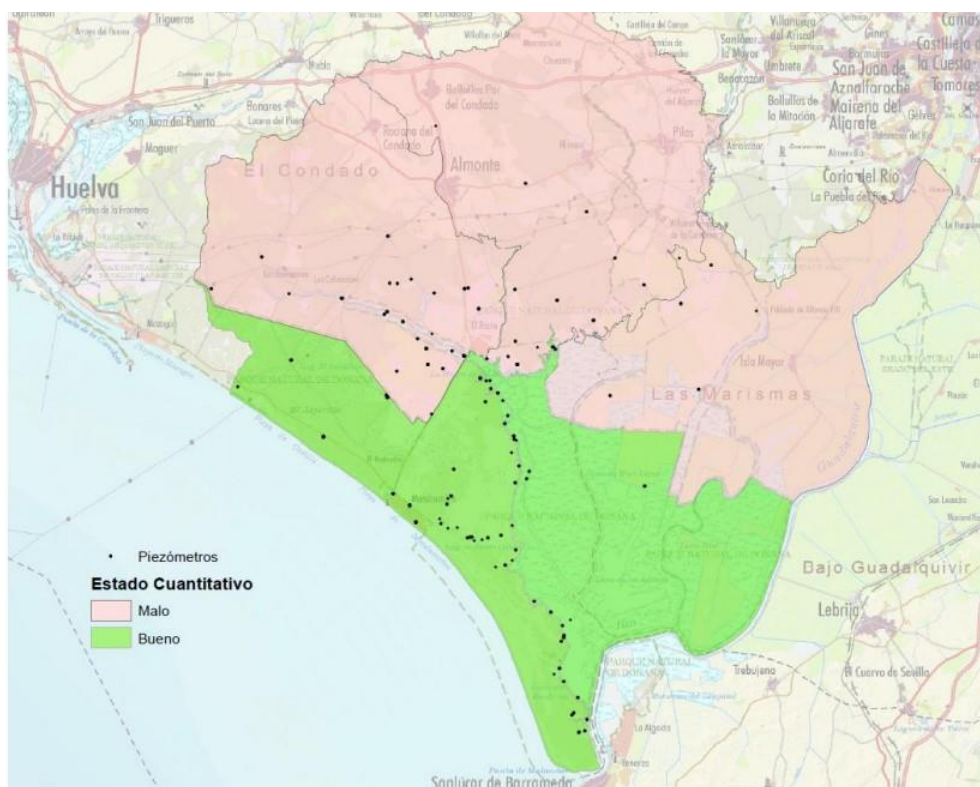

Figura 1. Masas de agua subterránea del RD 1/2016



Concretamente en el manto eólico de Doñana es donde se sitúa nuestra zona de estudio, que corresponde con una de las zonas consideradas como estado cuantitativo “bueno”.

La presente situación, obliga a la administración hidráulica a tomar una serie de medidas para asegurar el no deterioro, a realizar todas las acciones posibles para revertir este mal estado con vistas al horizonte de 2027; y a elaborar una serie de estrategias para recuperar el estado de las masas de agua de Doñana, debiendo contemplar ciertos aspectos como: la reversión de la tendencia descendente, recarga artificial en aquellas zonas donde sea viable, conocimiento de las aguas subterráneas, potenciación de las redes de medida química de las aguas subterráneas y superficiales, reubicación a corto plazo de los dos sondeos de Matalascañas más próximos al Parque Nacional y mejora de la coordinación entre administraciones, entre otras.

### 1.1 Antecedentes

Alrededor de 170.000 personas viven en las inmediaciones del Parque Nacional. El Parque proporciona ingresos a las comunidades locales a través del (eco)turismo y como escenario de la romería del Rocío. Alrededor del cuarenta por ciento de todos los puestos de trabajo en la región derivan de las actividades agrícolas (producción de aceitunas, árboles frutales, arroz, y bayas). Un alto porcentaje de los frutos rojos que se consumen en Europa (fresas, arándanos, frambuesas, moras) se producen en los suelos arenosos regados bañados por el sol cerca de Doñana.

Estas actividades agrícolas y otros usos humanos requieren una enorme cantidad de agua subterránea, casi 100 hm<sup>3</sup> al año. Alrededor del cuarenta por ciento de toda el agua que se infiltra en las unidades del acuífero alrededor de Doñana (predominantemente de lluvia) se utiliza para uso humano a través de la extracción de agua subterránea.

Esta extracción actualmente supera los límites sostenibles, ejerciendo presión sobre los acuíferos. En **2020** las autoridades españolas declararon oficialmente sobreexplotados algunos **acuíferos** y esto ha dado lugar a temores sobre el Valor Universal Excepcional del parque, considerando estar en peligro por falta de agua. Bajo estas circunstancias, una misión de monitoreo ha sido organizada conjuntamente entre el Patrimonio Mundial de la UNESCO, la UICN y la Secretaría de la Convención de Ramsar sobre los Humedales, llevada a cabo del 25 al 28 de febrero de 2020, por invitación de España (UNESCO World Heritage Centre, 2021).



Uno de los puntos a resaltar de este informe es que la misión no encontró evidencia científica documentada de impactos negativos de la extracción de agua subterránea del acuífero detrítico ni del acuífero de las dunas costeras. Y es que a pesar de los considerables recursos con que cuenta el Estado, ya dedicados a la conservación y restauración de la zona, sigue habiendo una falta de evidencia de interacciones significativas entre el acuífero detrítico y las marismas, lo que es considerado inaceptable para un lugar emblemático Patrimonio de la Humanidad como es el Parque Nacional de Doñana. Por lo tanto, el equipo de la misión recomienda que más investigación sobre el tema es de suma importancia para aclarar la dinámica hidrológica de Doñana. Esta es, precisamente, la principal razón por la que se ha llevado a cabo este estudio.

La información obtenida para este trabajo fin de máster proviene de un convenio de colaboración entre la Confederación Hidrográfica del Guadalquivir y la Universidad Pablo de Olavide. El objeto de este convenio es la ampliación del inventario, monitorización y modelización hidrológica de la relación laguna-acuífero en los mantos eólicos de Doñana, que permite el seguimiento de los procesos hidrológicos en el espacio natural de Doñana y, en concreto, el funcionamiento y estado hidrológico de las lagunas peridunares de este parque nacional, así como la adición a la red existente de nuevos piezómetros someros. El investigador principal de este acuerdo es el profesor del Área de Geodinámica Externa de la UPO, Miguel Rodríguez Rodríguez.

## 1.2 Objetivos

- ✓ Analizar el régimen hídrico actual de la laguna de Santa Olalla
- ✓ Modelizar su evolución durante el S.XXI bajo el escenario 4,5 del IPCC
- ✓ Estimar la tendencia, a través de un modelo hidrológico, de la evolución de la lámina de agua, es decir, el hidropериодо, de la laguna de Santa Olalla.

Para ello se necesitará:

- ✓ Analizar los datos meteorológicos de la laguna de Santa Olalla para así calcular su balance hídrico (entradas – salidas = variación en el almacenamiento).
- ✓ Analizar el hidrograma diario de la laguna durante el periodo 2015-2021



- ✓ Desarrollar un modelo hidrológico unidimensional diario para un escenario futuro (2030-2060) que ha sido calibrado a partir de los datos reales durante el periodo anterior (2015-2021).
- ✓ Estudiar la tendencia de diferentes variables que afectan a la laguna: precipitaciones, temperaturas máximas y mínimas, así como la evapotranspiración potencial y real, obtenidas a partir de los datos del AdapteCCa, una plataforma de consulta e intercambio de información en materia de impactos, vulnerabilidad y adaptación al cambio climático.

### 1.3 Zona de estudio

El Espacio Natural de Doñana, constituido por el Parque Nacional y el Parque Natural de Doñana, se localiza en el extremo occidental de Andalucía con territorio en las provincias de Huelva, Sevilla y Cádiz y cuya superficie es de 128.530 ha.

Desde la primera declaración del Parque Nacional de Doñana se han venido sucediendo distintos reconocimientos internacionales sobre el espacio natural que resaltan aún más si cabe la gran importancia e interés de sus valores naturales y culturales. Su relevancia internacional se pone de manifiesto por la inclusión de todo o parte del territorio del espacio natural en importantes redes supranacionales de extraordinario prestigio: Reserva de la Biosfera de la UNESCO ; Zona de Especial Importancia para las aves (ZEPA); Zona de Especial Conservación (ZEC); Lista Verde de la Unión Internacional para la Conservación de la Naturaleza (UICN); Patrimonio de la Humanidad de la UNESCO; junto a un conjunto de reconocimientos como la Carta Europea de Turismo Sostenible (CETS) o el Diploma del Consejo de Europa a la Gestión y Conservación, que ha ido renovando cada cinco años hasta la actualidad.

#### 1.3.1 Características climáticas de la zona de Doñana

El clima existente en el Parque Nacional de Doñana y su entorno corresponde con el denominado “Mediterráneo subhúmedo con influencia atlántica”. Éste se caracteriza por la variabilidad interanual de las precipitaciones, lo que condiciona la irregularidad de las aportaciones fluviales.





El número de horas de insolación es elevado, con una media anual de orden de 3.000 horas. Los vientos predominantes, por otro lado, son los del sureste y oeste.

La influencia del Atlántico produce una suavización de las temperaturas, de modo que la media anual es de en torno 17°C.

La precipitación anual media es del orden de 575 mm que se distribuyen del siguiente modo: 20% en primavera, 5% en verano, 35% en otoño y 40% en invierno.

La evapotranspiración potencial según el método de Thornthwaite suponen cifras muy elevadas (840 mm/año), ya que superan casi el 50% de la precipitación anual media.

Para evaluar de la evapotranspiración real se pueden distinguir en las siguientes zonas:

- ✓ Zona forestal, con una superficie de 710 km<sup>2</sup>, a la que se ha asignado una retención de 300 mm.
- ✓ Zona de textura más suelta y escasa vegetación (1130 km<sup>2</sup>). En este caso la retención considerada es de 100 mm.

Considerando los valores de retención anteriormente expuestos, se obtiene para la evapotranspiración real tiene un valor medio de 420 mm/año, equivalente al 73% de la precipitación media (*IGME. Instituto Geológico y Minero de España. Web Site Oficial España., n.d.*).

### 1.3.2 Entorno geológico e hidrogeológico

Las peculiaridades de nuestra zona de estudio se deben a las interacciones entre el clima y la geología, que a su vez determinan los procesos geomorfológicos de cada región geográfica y, por lo tanto, la hidrología resultante. Estas interacciones son muy cambiantes en el tiempo por lo que termina siendo difícil discernir el peso de cada uno de estos factores por separado.

En el Parque Nacional de Doñana se han distinguido tradicionalmente dos unidades hidrogeomorfológicas muy distintas: una depresión donde se depositaron los limos y las arcillas del estuario del río Guadalquivir (la marisma) y una planicie costera ocupada por varias generaciones de dunas con o sin movilidad (las arenas) de origen eólico. Desde un punto de vista geomorfológico, en el área de Doñana se distinguen tres Sistemas Morfogenéticos distintos, según su origen: la unidad estuarina, la litoral y la eólica (Clemente, Luis & Siljeström, Patricia & Rodríguez-Ramírez, Antonio, 1997).





La influencia oceánica suaviza el clima de la zona otorgándole un carácter relativamente más húmedo que se clasifica como clima mediterráneo subhúmedo. Por tanto, Doñana disfruta de una mayor disponibilidad de agua y humedad atmosférica que otras zonas netamente mediterráneas. La influencia Atlántica fue, además, clave en el origen y paleoevolución de Doñana.

Durante miles de años la desembocadura de la depresión del Bajo Guadalquivir consistía en una enorme ría, ya que no se formó un verdadero estuario hasta que, tras generaciones de dunas depositadas por el mar, se formó una barra costera arenosa que fue extendiéndose y cambiando de forma y posición a lo largo del Cuaternario (Custodio et al., 2009).

En definitiva, los materiales geológicos son de origen Cuaternario y Plio-Cuaternario y presentan un distinto grado de permeabilidad según su textura: mucho mayor en las arenas y gravas que en los limos y arcillas. Además, este paquete de sustratos se asienta sobre un grueso estrato de margas azules miocenas de origen marino que son altamente impermeables por lo que sellan los materiales superiores formando el acuífero de Doñana, con una superficie de unos 3000 km<sup>2</sup>.

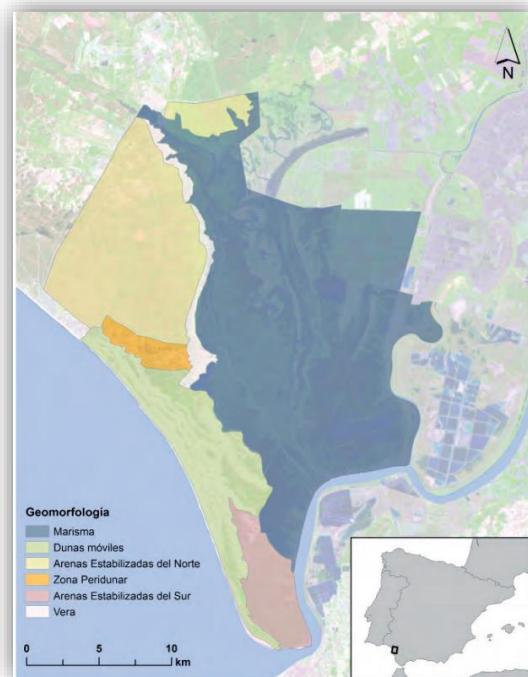

Figura 2. Caracterización geomorfológica del sistema de lagunas de Doñana. Fuente: Díaz-Paniagua



Dentro del manto eólico del Parque Nacional, se han considerado las siguientes áreas descritas: arenas estabilizadas del norte, ecotono de la vera, área peridunar, dunas móviles y arenas estabilizadas del sur (Díaz-Paniagua & Aguilar Alba, 2015).

Precisamente es en la Zona Peridunar, que se localiza en el límite Este (interior) de los sistemas móviles, donde se sitúan las lagunas que mantienen el agua prácticamente todo el año, ya que están alimentadas por la descarga de AASS del acuífero de los sistemas dunares móviles y estabilizados. Sus fondos presentan perfiles arenosos con un contenido moderado de sedimentos finos, baja conductividad eléctrica y ligera acidez en los horizontes más profundo. El horizonte superficial puede presentar altas concentraciones de materia orgánica y sales.

Al tratarse de arenas finas–medias, con una granulometría bastante regular, tienen una permeabilidad superficial elevada y una relativamente baja capacidad de campo. El resultado es una elevada tasa de recarga de las aguas subterráneas y una baja escorrentía superficial.

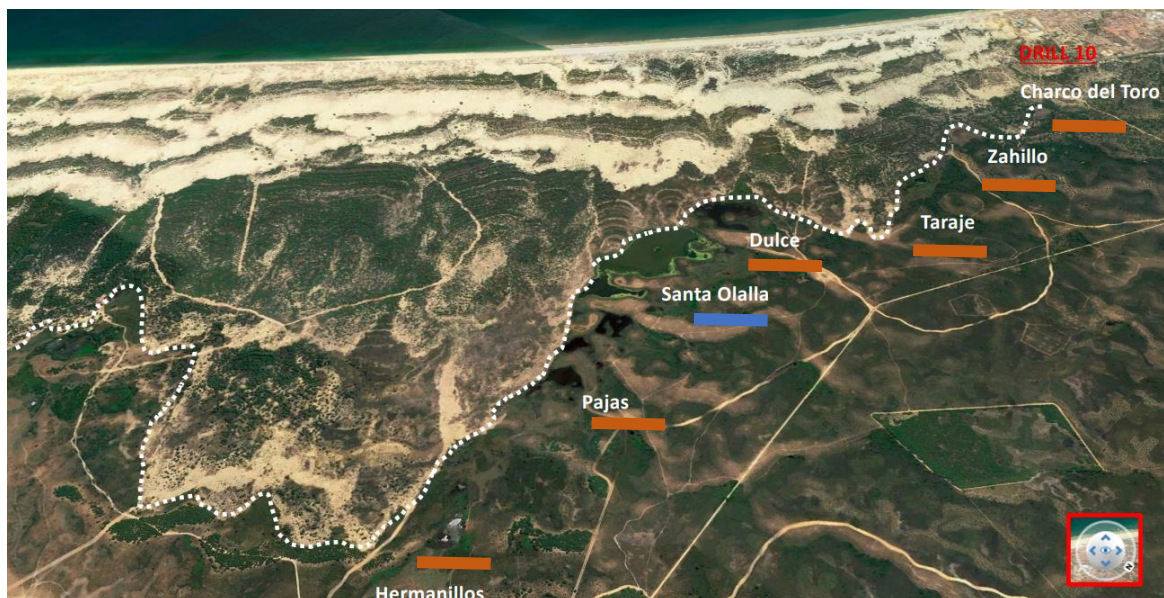

Figura 3. Localización de las lagunas peridunares de Doñana



### 1.3.3 Características de la laguna de Santa Olalla

El conocimiento que se tiene del modelo conceptual del sistema de lagunas de Santa Olalla, nos dice que ésta es el único sistema con hidroperíodo permanente ubicado en esta área protegida. Además, las interacciones complejas entre agua superficial y agua subterránea, no visibles a través de métodos descriptivos, se han distinguido por tener un fuerte componente estacional. Es decir, todos los niveles freáticos y los niveles de agua disminuyen durante el verano, cuando ocurren muy pocos eventos de precipitación.

De la misma manera, los valores registrados en los meses de enero a mayo, experimentan una subida, que coincide con un periodo de abundantes precipitaciones (Fernández Ayuso, 2019).

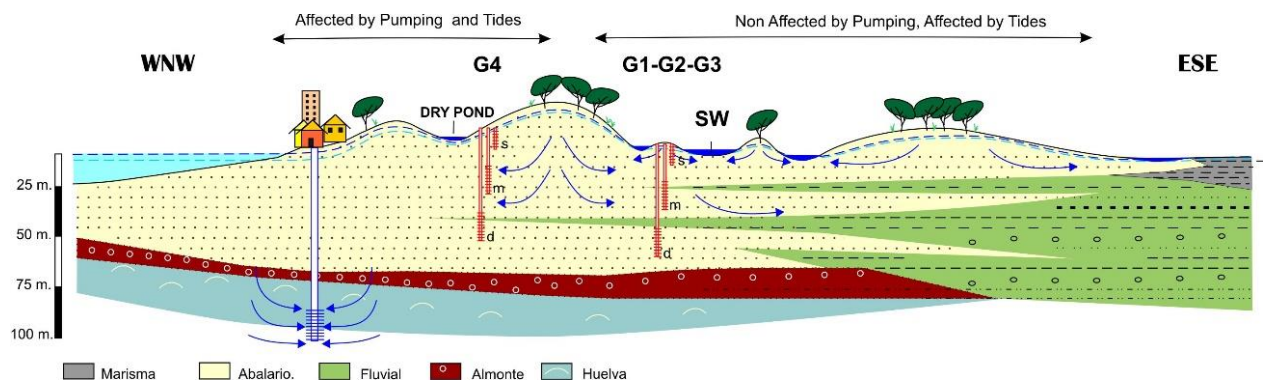

Figura 4. Esquema hidrogeológico del sistema lagunar Dulce-Santa Olalla-Pajas. Fuente: Fernández-Ayuso et al., 2019

Según varios estudios, entre ellos, Rodríguez-Rodríguez et al., (2017) y Fernández-Ayuso, Rodríguez-Rodríguez, et al., (2020), se registra que las entradas de agua a la laguna se producen por precipitación directa sobre el vaso lacustre y por escorrentía que, dada la elevada permeabilidad de los materiales arenosos sobre los que se ubica la laguna, es mayoritariamente subterránea. Por otro lado, las salidas se suelen producir casi exclusivamente por evaporación desde la lámina de agua superficial y solo en ocasiones, por la descarga de la laguna al acuífero,





## 2. MATERIALES Y METODOLOGÍA

### 2.1 Datos meteorológicos de la laguna de Santa Olalla

Para llevar a cabo este proyecto, han sido necesarios los datos meteorológicos de la zona donde está ubicada la laguna de Santa Olalla.

Los datos de precipitación y temperatura han sido obtenidos a partir de la web de la Red de Información Agroclimática de Andalucía (RIA), concretamente de las dos estaciones meteorológicas más cercanas al punto de estudio: Estación del Acebuche y Estación de Almonte. (Red de Información Agroclimática de Andalucía (RIA) Instituto de Investigación y Formación Agraria y Pesquera (IFAPA), n.d.)

Además, a partir de los datos de precipitación y temperatura y un equipo de sensores, instalado en Doñana, se ha podido calcular de manera automática y diaria la evapotranspiración potencial (ETP) y la evaporación real (ETR) de esta zona. El meteorolísímetro fue instalado en 2015 para tomar medidas más precisas del balance del agua del suelo de esta zona peridunar.

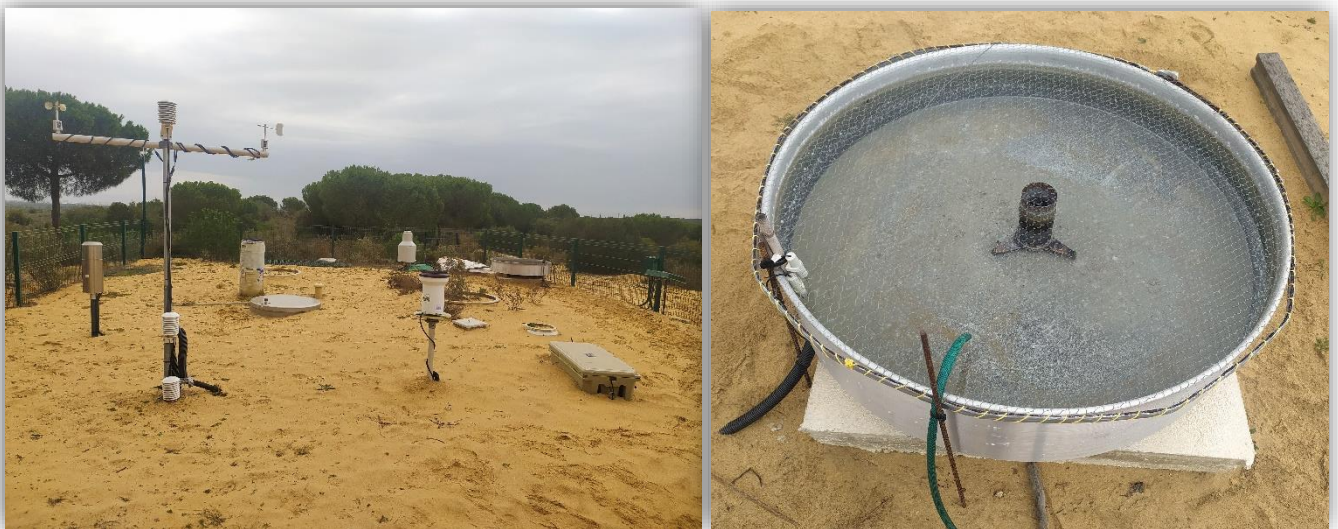

Figura 5. Equipo utilizado para medir la evapotranspiración potencial y la evaporación real de la zona de Doñana.



## 2.2 Cálculo de la escorrentía

Una vez obtenidas las diferentes series meteorológicas de las estaciones termopluviométricas, se halla la escorrentía a través del programa de tratamiento y gestión de series temporales hidrológicas denominado TRASERO, realizado por el Departamento de Ciclo Hídrico de la Diputación de Alicante en 2005.

De manera que a partir del método de Hargreaves (el usado por este programa) y las series de precipitaciones, temperaturas máximas y mínimas, se crean series modelizadas de evapotranspiración potencial (ETP), real (ETR) y escorrentía.

Una vez obtenida la ETP, este valor se utiliza para estimar la evaporación directa desde la laguna (McMahon et al., 2013), teniendo en cuenta que no se seca durante el periodo de calibración.

A través del balance conseguido entre la precipitación y la escorrentía subterránea como entrada principal de agua a la laguna y la evaporación como salida de la misma, podemos obtener el modelo predictivo para las estimaciones futuras.

## 2.3 Cálculo de las series reales (2015-2020)

Además de los datos meteorológicos obtenidos de las distintas estaciones climáticas, en la misma laguna de Santa Olalla hay ubicados varios piezómetros de donde se ha medido la evolución de la profundidad del nivel freático, así como la profundidad de la laguna con unas regletas ubicadas en el centro de ésta. Esta medición lleva realizándose desde el 2015 hasta el día de hoy y aunque se haga de manera automática, se llevan a cabo medidas directas en campo para verificar que los aparatos están calibrados. Estos datos han sido suministrados por el equipo investigador del departamento de Geodinámica Externa de la Universidad Pablo de Olavide.





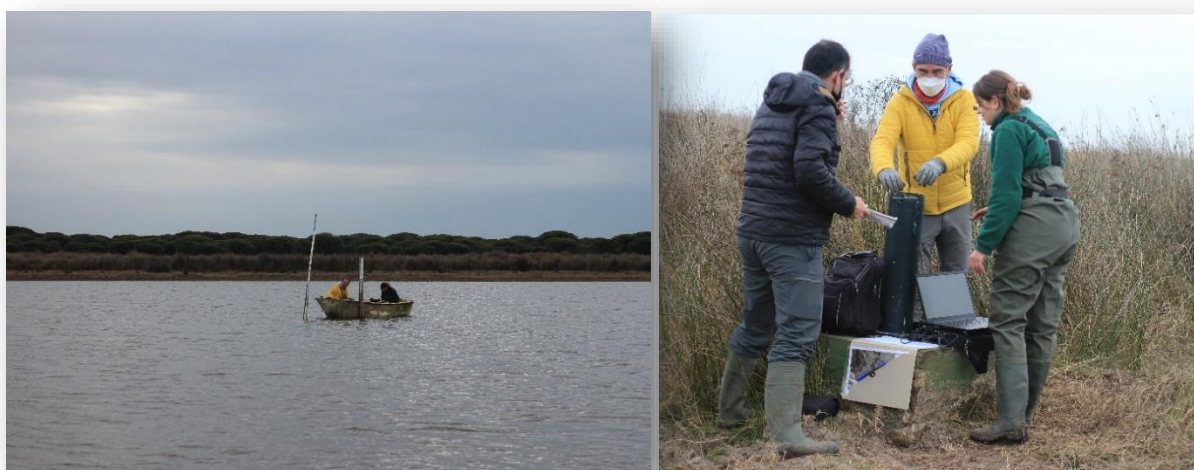

Figura 6. Medición y descarga de datos de nivel de la laguna (regleta central) y de un piezómetro situado en la orilla oeste de la laguna de Santa Olalla (31/01/2022)

## 2.4 Cálculo de las series futuras (2030-2060)

### 2.4.1 Base datos AdaptecCa

Los datos de las series futuras se han descargado del portal AdaptecCa, plataforma sobre adaptación al cambio climático en España, de la Oficina de Cambio Climático (*Plataforma Sobre Adaptación al Cambio Climático en España*, n.d.). Estos datos, del proyecto EUROCORDEX, son un Downscaling. En esta plataforma nos hemos descargado datos diarios de las variables de precipitaciones, temperatura máxima y temperatura mínima de las proyecciones de futuro para los escenarios de emisión RCP 4,5 y RCP 8,5, dentro del municipio de Almonte, la zona más cercana a nuestra área de estudio, concretamente seleccionamos el punto 3 (longitud -6.54, latitud 37.09). Cabe reiterar que los RCPs no son predicciones ni recomendaciones políticas, sin embargo, han sido elegidos para describir posibles escenarios futuros.

Finalmente, como ambos escenarios mostraban resultados tan parecidos para un periodo de 30 años, se decide tomar como referencia para nuestro estudio tan solo el escenario RCP 4,5, considerado de mitigación mediana.



Además, se han descargado las simulaciones históricas para poder corregir el sesgo de las simulaciones futuras. En total se han obtenido datos de 16 modelos diferentes.

Con estos 16 modelos se hicieron un estudio de correlación, y de éstos se seleccionó el número 8 al ser el que daba una correlación más alta, tal y como se observa en el gráfico.

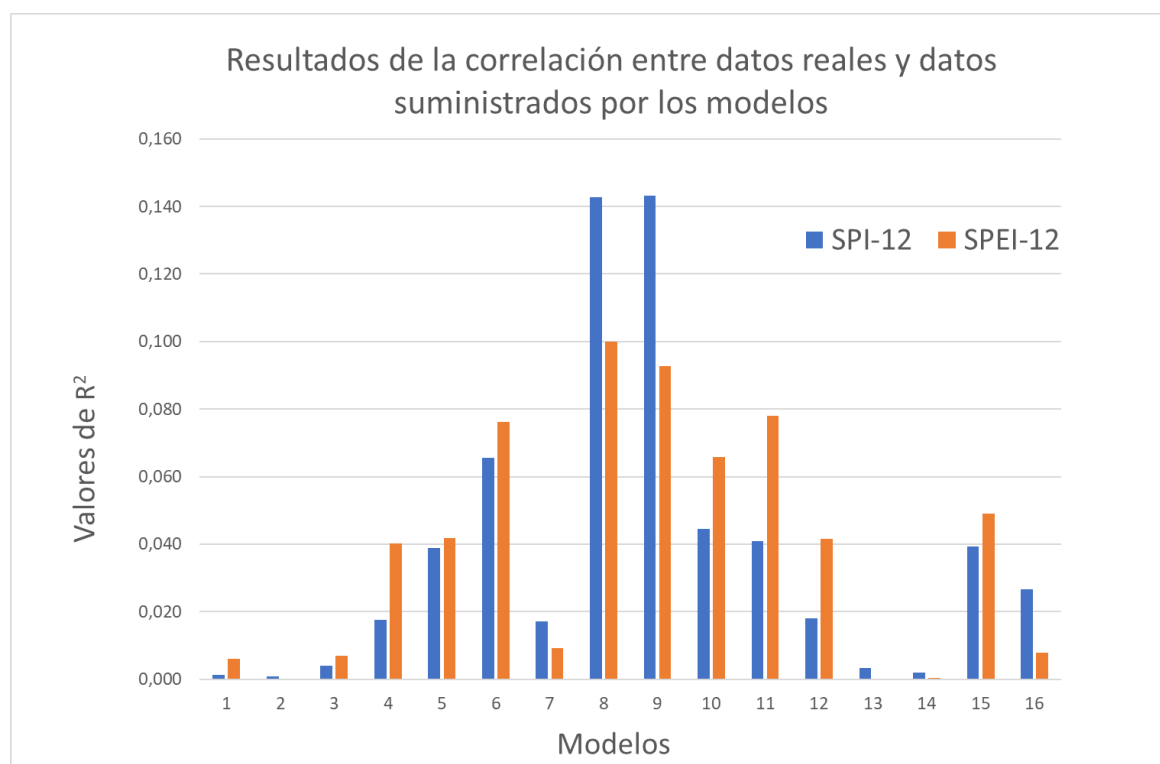

Figura 7. Resultados de la correlación entre los datos reales medidos en la estación de Almonte y los resultados obtenidos por los 16 modelos de simulación durante el periodo histórico considerado

## 2.4.2 Corrección del BIAS

Una vez realizado lo anteriormente comentado, se ha realizado un Bias Correction, o corrección del sesgo, de las proyecciones futuras para cada escenario de cambio climático. Esta corrección se ha realizado calculando un factor de corrección, restando el valor de las precipitaciones futuras al de las históricas simuladas, y este resultado se divide por el valor de las históricas simuladas. Cuando los resultados tras aplicar este cálculo dan 0, se indica que las precipitaciones históricas son 0, de esta forma se elimina el error al dividir entre 0.



A continuación, se multiplican las precipitaciones observadas por el factor de corrección obtenido anteriormente y se le suma el valor de las precipitaciones observadas. Se eliminan los errores de precipitaciones negativas adjudicándoles el valor 0 y se hace un “truncamiento” para eliminar el error de valores de precipitaciones excesivamente altos, seleccionando el valor máximo de precipitaciones de toda la serie e indicando que ese sea el valor en el momento en el que se supere esta cifra máxima. Finalmente, se indica que los valores que salían en el BIAS que son mayores que el valor máximo de precipitaciones de la serie, nos lo devuelva como el valor máximo. De esta manera, se obtiene el BIAS de la Serie Futura de precipitaciones.

## 2.5 Elección del modelo hidrológico

Tras la experimentación con varios modelos hidrológicos, se ha escogido el que resulta más adecuado para este contexto hidrogeológico, el cual se caracteriza por tener una alta permeabilidad y transmisividad (al ser una zona peridunar) y donde se han tenido en cuenta la precipitación y esorrentía subterránea como entrada principal y la evaporación como salida. En este caso, al existir tan poca recarga desde la laguna al acuífero, no se tiene en cuenta como salida en el balance hídrico.

En **modelo 1** (color amarillo), se han considerado como salidas la evaporación. Las entradas: precipitación y esorrentía, suponiendo que la cuenca es aproximadamente 7 veces el tamaño de la laguna  $\rightarrow P+ESC*7$  (Los resultados obtenidos se miden en mm/día).

A partir del balance diario se realiza la simulación. Concretamente, para este balance los resultados no salen coherentes comparado con la altura real de la laguna, y no es adecuado porque el medio es muy permeable y cada vez que llueve, la altura de la laguna aumenta de forma poco significativa.

En el **modelo 2** (color naranja), se trata de evitar el problema del tamaño de la cuenca. Por ello, la fórmula utilizada será la misma que la anterior, salvo que en este caso se asume que la proporción real de la cuenca vertiente es de 9,5  $\rightarrow P+ESC*9,5$

Este modelo se ajusta bastante al principio y al final de la evolución real, sin embargo, en los años intermedios la curva de la profundidad es demasiado elevada, por lo que tampoco lo consideramos válido.



En el **modelo 3** (color verde), se decide introducir un factor a la precipitación, al considerar como entrada además del agua de las lluvias, aquella que llega por la descarga del acuífero, que se calcula que es 3 veces mayor que la precipitación, lo cual se justifica con los resultados de modelos hidrológicos realizados anteriormente por el grupo de Hidrogeología del Área de Geodinámica Externa. En este caso la esorrentía no es multiplicada por ningún factor  $\rightarrow P*3,05+ESC$

Este balance es el que mejor se ajusta y aunque haya cierta incertidumbre, al ser calibrado con las series reales, es finalmente el elegido para posteriormente extrapolarlo a series futuras.

### 3. RESULTADOS Y DISCUSIÓN

#### 3.1 Evolución real (2015-2020)

Uno de los resultados obtenidos en este trabajo de investigación, es la evolución de la lámina de agua de la laguna de Santa Olalla para un periodo de 7 años que comprende desde el año 2015 hasta principios de 2021. A continuación, en la figura 8, se muestra esta evolución de la profundidad en relación con las precipitaciones habidas en la zona de estudio para ese mismo periodo.



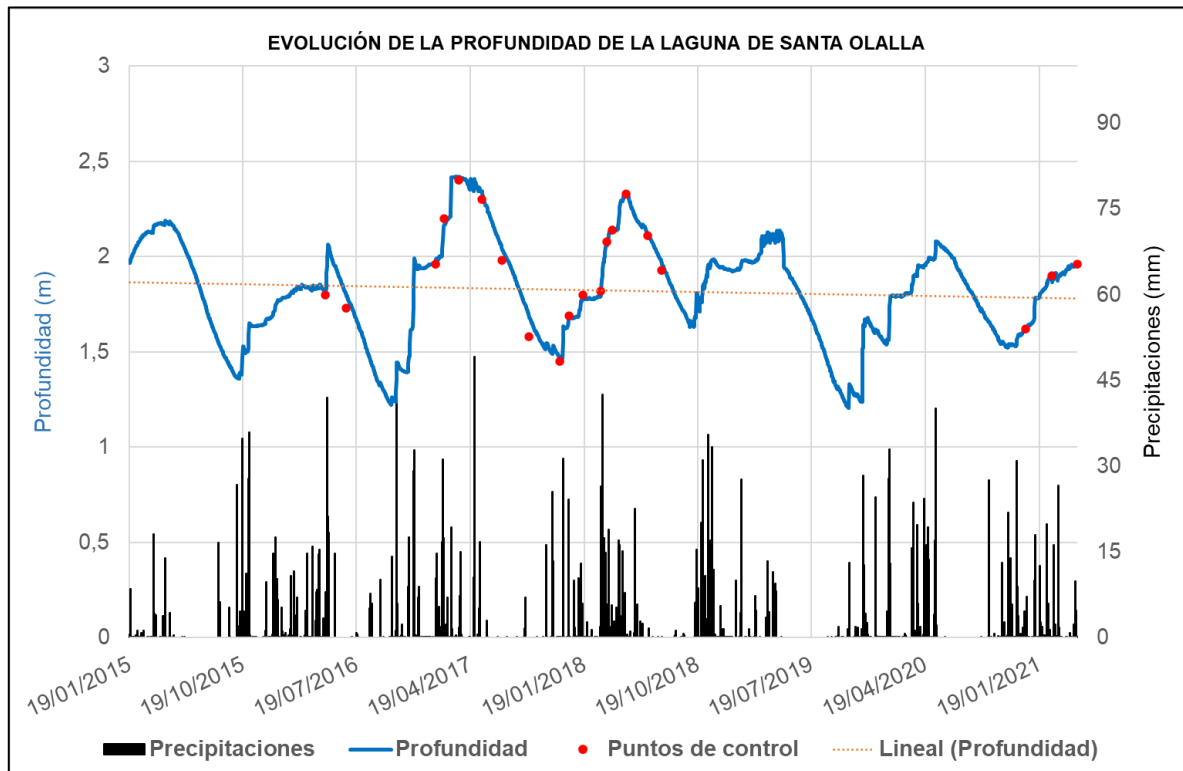

Figura 8. Evolución de la lámina de agua de la laguna de Santa Olalla (2015-2021)

Además, se ha relacionado, como se percibe en la figura 9, que la altura de la lámina de agua fluctúa de manera similar que la Desviación Acumulada de Precipitación Media (DAPM) calculada, es decir, la línea del DAPM es casi paralela a la que muestra el piezómetro. Por lo tanto, se deduce que estas variables están íntimamente relacionadas.





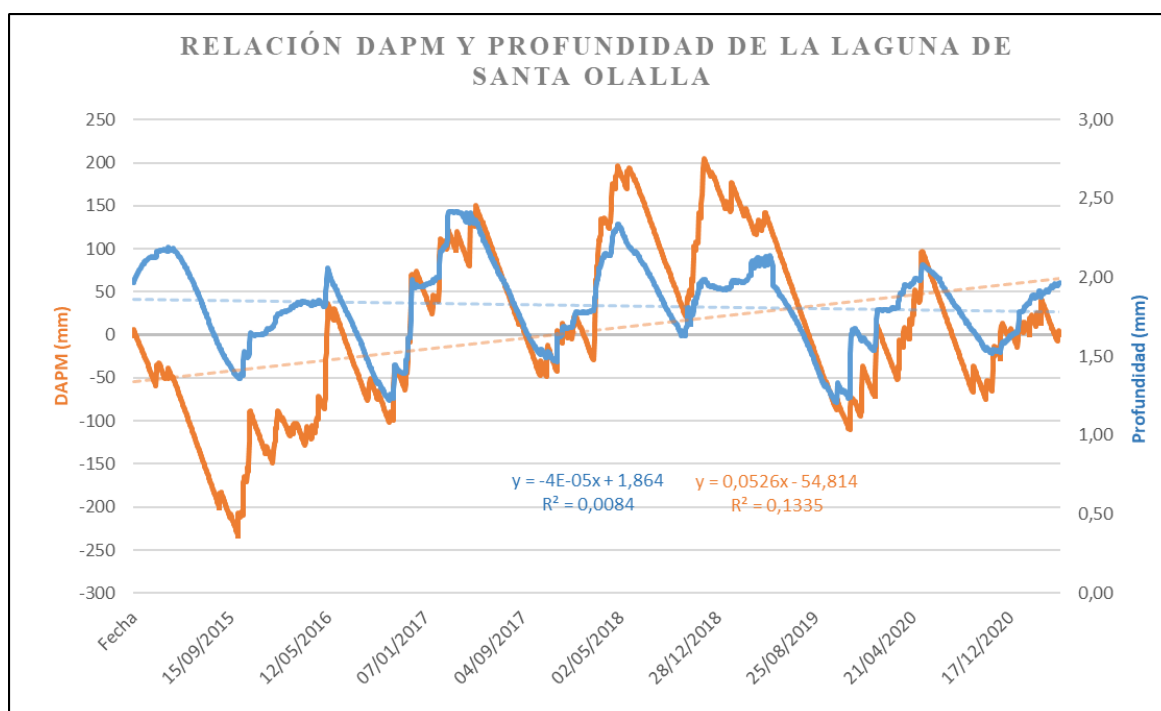

Figura 9. Desviación acumulada de precipitaciones medias frente a profundidad de la laguna de Santa Olalla (2015-2021)

Una vez conocida la evolución real de la laguna, se busca modelizar esta tendencia para poder aplicar este patrón a datos futuros y así prever lo que ocurrirá a medio-largo plazo (hasta 2060).

A la hora de elegir el modelo hidrológico, como se comenta en el apartado de metodología y como aparece en la siguiente figura 10, se ha elegido el modelo 3 (en color verde) frente al modelo 1 (en color amarillo) y al modelo 2 (en color naranja), por ser el que más se ajusta a la evolución real de la lámina de agua de la laguna.



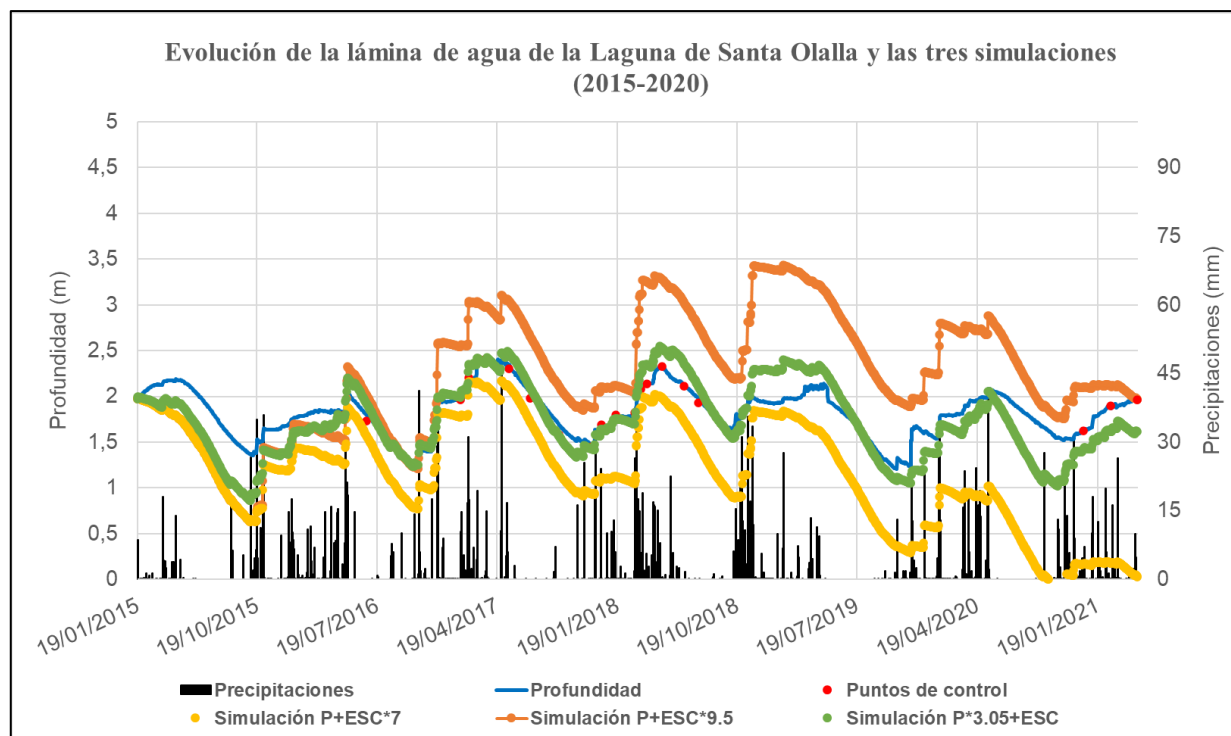

Figura 10. Evolución de la lámina de agua real y de las 3 simulaciones

Resulta interesante analizar las tendencias de ciertas variables que ayudan a conocer el comportamiento de la laguna. En la tabla 1, aparecen reflejados los estadísticos básicos para cada una de estas variables con las que se han trabajado en el presente estudio, donde “*n*” es el número total de datos obtenidos y disponibles para este periodo; “*máx*” y “*mín*” que son las cifras de mayor y menos valor, respectivamente, dentro del rango de datos; “*mediana*” que es el valor que ocupa el lugar central de todos los datos *n* cuando éstos están ordenados de menor a mayor; y “*media*” que es el valor promedio del conjunto *n*.

| Estadísticos para el periodo 2015-2020 |                 |                    |             |             |
|----------------------------------------|-----------------|--------------------|-------------|-------------|
|                                        | Profundidad (m) | Precipitación (mm) | Tª MAX (°C) | Tª MIN (°C) |
| <b>n</b>                               | 2284            | 2284               | 2284        | 2284        |
| <b>máx</b>                             | 2,42            | 49,20              | 43,60       | 23,90       |
| <b>mín</b>                             | 1,21            | 0,00               | 8,10        | -1,90       |
| <b>mediana</b>                         | 1,83            | 0,00               | 23,80       | 11,80       |
| <b>media</b>                           | 1,82            | 1,33               | 25,09       | 11,47       |

Tabla 1. Estadísticos básicos I de las variables hidrometeorológicas (2015-2020)



Respecto a la **profundidad** de la laguna, cabe resaltar que en un momento dado llegó a alcanzar valores máximos de 2,42 m, así como valores mínimos de 1,21 m, siendo la tendencia central de la lámina de agua 1,83 m y su altura media 1,82 m.

En cuanto a las **precipitaciones**, de manera general suelen ser escasas llegando a los 49,20 mm de manera puntual en días muy lluviosos, sin embargo, la tendencia sea los 0 mm, como lo indica sus valores mínimos y la mediana. La precipitación media en la laguna es de 1,33 mm/día.

Otras de las variables en juego son las **temperaturas máximas y mínimas**. En este caso, como clima característico mediterráneo subhúmedo, varían mucho en función a la estación del año en la que nos encontremos. Éstas se ven comprendidas entre los 43,60 °C de máxima en verano y los -1,9 °C de mínimas en invierno, aunque las temperaturas máximas suelen rondar los 25 °C y las mínimas los 12 °C.

| Estadísticos para el periodo 2015-2020 |                     |                    |                          |                        |                        |
|----------------------------------------|---------------------|--------------------|--------------------------|------------------------|------------------------|
|                                        | Escorrentía<br>(mm) | ETP Penman<br>(mm) | Evaporación real<br>(mm) | ETP Hargreaves<br>(mm) | ETR Hargreaves<br>(mm) |
| <b>n</b>                               | 2284                | 2284               | 2284                     | 2284                   | 2284                   |
| <b>máx</b>                             | 40,44               | 10,00              | 12,00                    | 10,02                  | 7,42                   |
| <b>mín</b>                             | 0,00                | 0,50               | 0,60                     | 0,62                   | 0,00                   |
| <b>mediana</b>                         | 0,00                | 3,30               | 3,96                     | 3,99                   | 0,00                   |
| <b>media</b>                           | 0,34                | 3,79               | 4,55                     | 4,28                   | 0,99                   |

Tabla 2. Estadísticos básicos II de las variables hidrometeorológicas (2015-2020)

En relación a la **escorrentía**, es la precipitación que cae sobre el territorio del área de Doñana la que genera escorrentía superficial y recarga de forma difusa al acuífero. Además, durante todo el año, en estado natural los cursos superficiales permanentes y la mayoría de los estacionales reciben y transportan agua de origen subterráneo (Manzano, et al., 2009). Por lo tanto, como se presenta en la tabla, al ser las precipitaciones poco frecuentes, la escorrentía creada también lo es, del orden de 0,34 mm/día. Salvo ocasiones concretas, donde se ha llegado hasta los 40,44 mm, lo habitual es que ésta sea inexistente.

A partir de la ETP calculada por el método de Penman, es decir, la cantidad máxima de agua que podría llegar a evaporarse si la humedad del suelo y la cobertura vegetal fueran



las óptimas; se obtiene la evaporación real ( $ETP * 1,2$ ), y estos valores rondan los 12 mm de máxima y los 0.60mm de mínima, siendo la evaporación real media de 4,55 mm al día.

Por otro lado, respecto a la **Evapotranspiración potencial y real** (ETP y ETR) calculadas por el método de Hargreaves, cabe decir que la cantidad de agua que podría llegar a evaporarse potencialmente es de 4,28 mm, sin embargo, bajo las condiciones climáticas de nuestra área de estudio, la evapotranspiración real es de casi 1mm. Si hablamos de valores máximos y mínimos, según el modelo, la ETP oscilaría entre 10,02 y 0,62 mm respectivamente; y la ETR entre 7,42 y 0 mm respectivamente.

### 3.2 Evolución simulada (2030-2060)

Una vez obtenido el modelo hidrológico que mejor se ajusta a la evolución real de la laguna, permite estimar cual será la tendencia futura, concretamente para un rango de 30 años, desde el año 2030 hasta el 2060. Cabe recordar que el escenario climático de emisión elegido es el RCP 4,5.

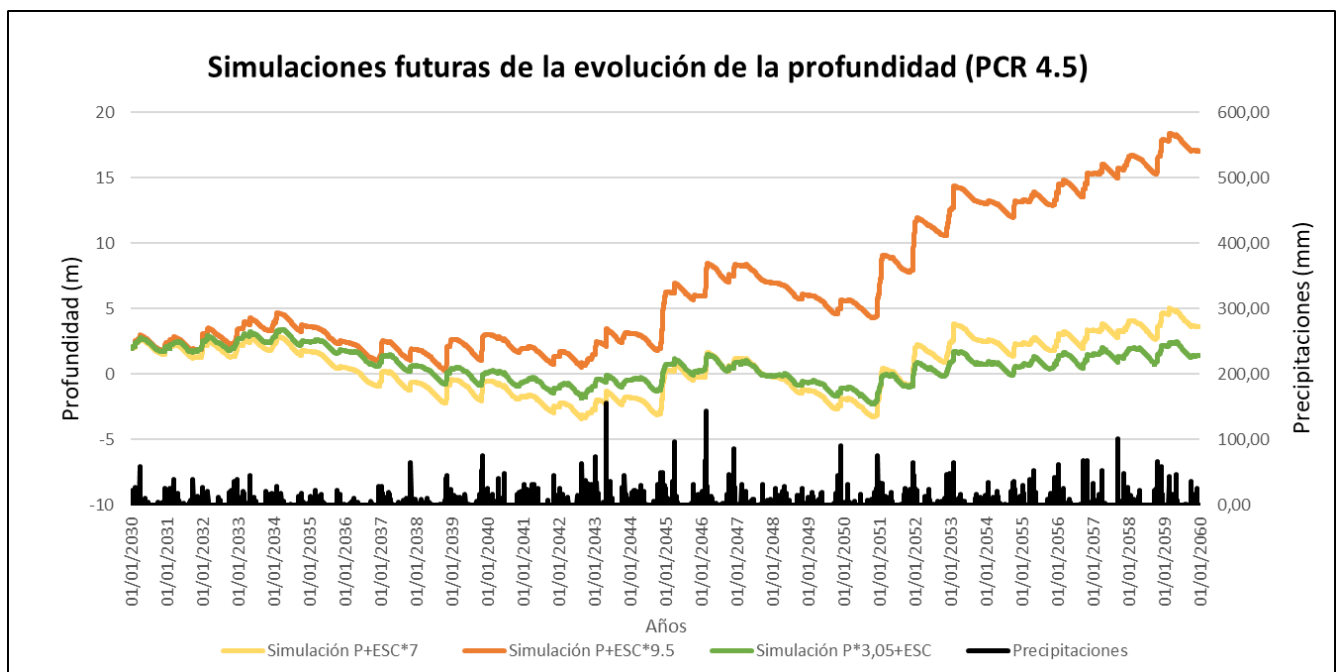

Figura 11. Simulaciones futuras (2030-2060) de la evolución de la profundidad de la laguna de Santa Olalla



Como se observa en la figura 11, se ha probado a simular la evolución de la profundidad de la laguna con los 3 modelos hidrológicos que fueron usados para determinar finalmente el más ajustado. Efectivamente, apreciamos que tanto el modelo 1 (P + ESC\*7) como el modelo 2 (P +ESC\*9,5) alcanzan valores máximos o mínimos fuera de lo previsible. Será, por lo tanto, como se ha previsto, el modelo 3 (P\*3 + ESC) el más coherente con los resultados esperados.

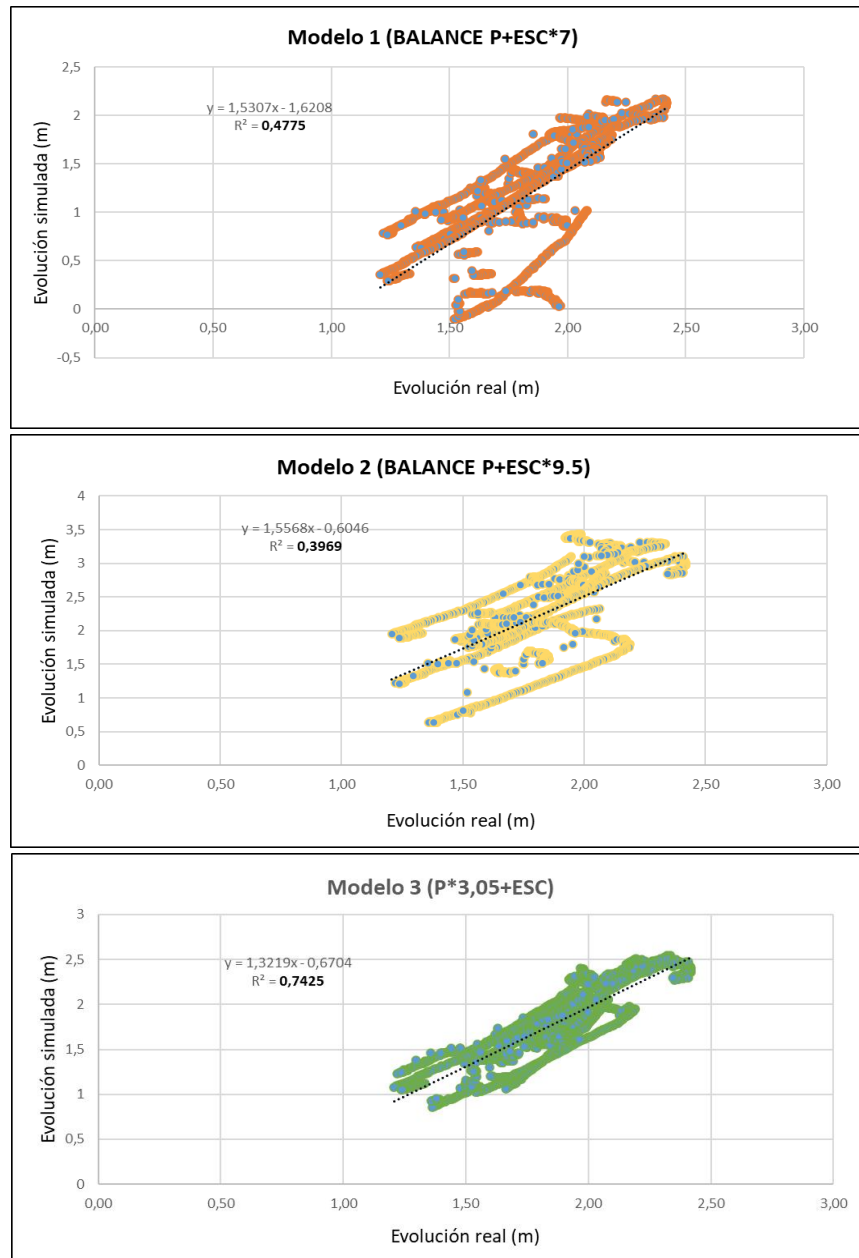

Figura 12. Correlación entre los modelos hidrológicos simulados 1, 2 y 3 y la evolución real de la laguna (2030-2060)





Aun así, se ha procedido a probar las correlaciones de las 3 simulaciones con la evolución real y como se contempla en la figura 12, el R2 más cercano a 1, es decir, el más ajustado, es el modelo 3 (en verde).

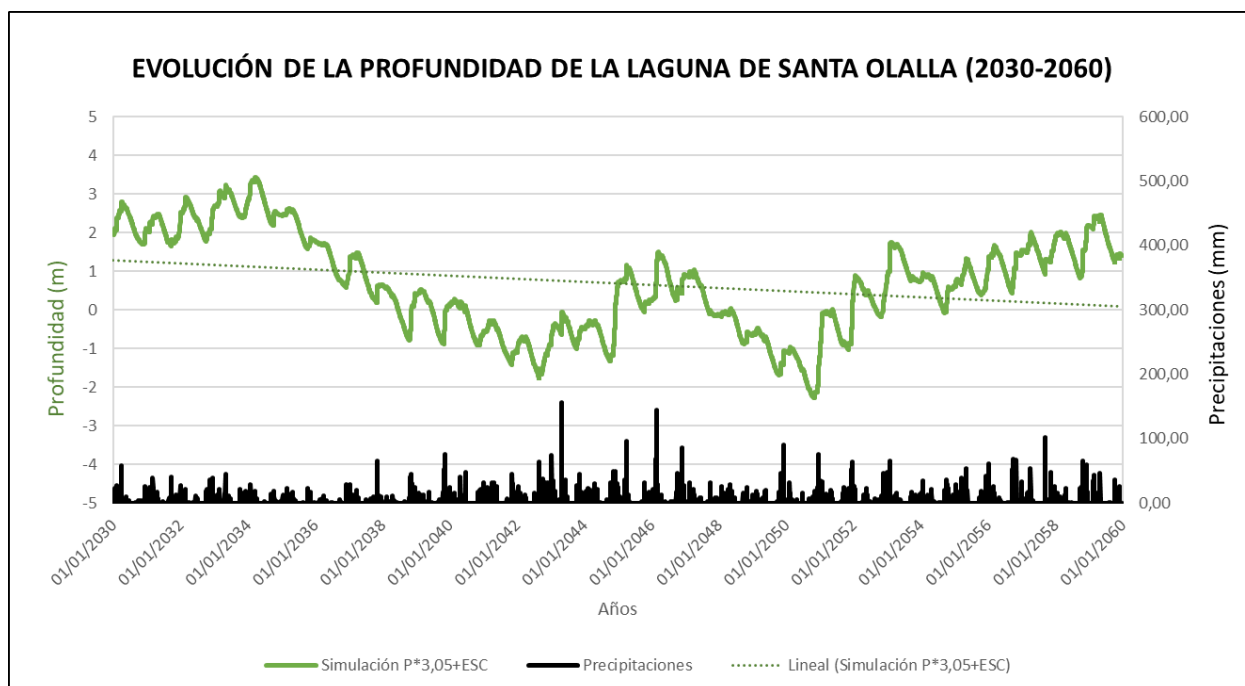

Figura 13. Evolución de la profundidad de la laguna para la simulación escogida (PCR 4.5 - P\*3.05+ESC) para el periodo de 2030 al 2060

Finalmente, los resultados del modelo predicen que la evolución de la profundidad de la laguna de Santa Olalla variará considerablemente a lo largo de 2030-2060, llegando a secarse (valores negativos) completamente durante periodos como ocurre desde 2038 hasta 2044, así como desde el 2048 hasta 2051; y durante momentos puntuales como por ejemplo en 2052 y 2054.

| Estadísticos para el periodo 2030-2060 |                 |                    |             |             |
|----------------------------------------|-----------------|--------------------|-------------|-------------|
|                                        | Profundidad (m) | Precipitación (mm) | Tª MAX (°C) | Tª MIN (°C) |
| <b>n</b>                               | 10958           | 10958              | 10958       | 10958       |
| <b>máx</b>                             | 3,42            | 156,00             | 54,66       | 30,53       |
| <b>mín</b>                             | -2,28           | 0,00               | 3,62        | -13,72      |
| <b>mediana</b>                         | 0,67            | 0,00               | 24,48       | 10,75       |
| <b>media</b>                           | 0,69            | 1,34               | 25,23       | 10,37       |

Tabla 3. Estadísticos básicos I de las variables hidrometeorológicas (2030-2060)



|                | Estadísticos para el periodo 2030-2060 |                        |                          |
|----------------|----------------------------------------|------------------------|--------------------------|
|                | Escorrentía<br>(mm)                    | ETP Hargreaves<br>(mm) | Evaporación real<br>(mm) |
| <b>n</b>       | 10958                                  | 10958                  | 10958                    |
| <b>máx</b>     | 137,56                                 | 12,81                  | 15,01                    |
| <b>mín</b>     | 0,00                                   | 0,10                   | 0,00                     |
| <b>mediana</b> | 0,00                                   | 4,04                   | 4,26                     |
| <b>media</b>   | 0,49                                   | 4,33                   | 4,62                     |

Tabla 4. Estadísticos básicos II de las variables hidrometeorológicas (2030-2060)

Para esta nueva situación futura, los datos varían ligeramente:

Respecto a la **profundidad** de la laguna, cabe resaltar que en un momento dado llega a superar los 3,4 m de altura. De la misma manera, también llega a niveles de hasta -2m, es decir, la laguna llega a secarse completamente, como por ejemplo ocurriría entre julio 2038 y diciembre 2044, salvo meses excepcionales donde los valores serían ligeramente positivos. Tanto es así, que el promedio para este periodo, ronda los 0,6 m de altura.

En cuanto a las **precipitaciones**, de manera general siguen siendo escasas, con un promedio de 1.34 mm por día, sin embargo, esta proyección estima que los episodios de lluvias serán más intensos, llegando a los 156 mm de máxima diaria.

Tanto las **temperaturas medias máximas** como las **mínimas**, en este caso, siguen oscilando entre los 25°C y 14°C respectivamente. En este último caso, se aprecia un ligero descenso de las temperaturas mínimas medias en casi 2°C.

En relación a la **escorrentía**, tan solo aumenta considerablemente en los episodios de precipitaciones intensas, llegando a alcanzar los casi 138 mm/día; pero la tendencia general, al seguir siendo las precipitaciones poco frecuentes, ronda los 0 mm/día de escorrentía.

Y por último, en referencia a la **evaporación real** medida con el método de Hargreaves, sigue manteniendo una media de entorno los 4 mm/día. Aunque como se comenta con las variables anteriores, los máximos y mínimos son más extremos. Las cantidades mínimas permanecerían parecidas, es decir, valores de entorno los 0 mm/día, mientras que las máximas se duplican, es decir, el agua que podría llegar a evaporarse es de hasta 15 mm/día.



#### 4. CONCLUSIONES

Se ha analizado el **hidrograma** diario de profundidad del agua de la laguna de Santa Olalla durante el periodo 2015 - 2021, así como la **DAPM** diaria durante el mismo periodo. La **evolución es semejante**, lo cual indica que la laguna es muy sensible a los eventos de lluvia y de descarga de aguas subterráneas en el acuífero libre superficial.

Sin embargo, también se aprecia que la **tendencia lineal de la DAPM** es ligeramente **positiva** entre 2015-2021, mientras que la pendiente de la serie **profundidad** de la laguna es prácticamente **ceró**. Esto implica que la evolución de la lámina de agua (que es función de la descarga de aguas subterráneas) **podría** estar siendo afectada por procesos **antrópicos** que tengan lugar en el acuífero de los mantos eólicos.

Además, se ha desarrollado un **modelo unidimensional** de evolución de la profundidad en la laguna, a partir de la calibración de los datos diarios obtenidos de la precipitación como variable principal y de la esorrentía subterránea como variable secundaria, durante 2015-2020. En dicho modelo se han tenido en cuenta la precipitación y la esorrentía como entradas principales y la evaporación directa desde la lámina de agua como salidas principales.

Una vez que se ha **calibrado** y **validado** este modelo para el periodo 2015-2021, se ha aplicado al periodo 2030-2060 siguiendo el **modelo predictivo del IPCC 4,5**.

Los principales resultados obtenidos de la **modelización** para 2030-2060 son los que siguen:

1. Por un lado, se prevé que durante el **30%** del tiempo la laguna se encuentre completamente **seca**, o lo que es lo mismo, **9 años** de los 30 que contempla la predicción.
2. Por otro lado, se estima también que las precipitaciones seguirán siendo escasas, de entorno a los 1,34 mm/día. Sin embargo, lo que difiere significativamente del periodo de estudio es la distribución de estos **episodios de lluvias**, que serán menos frecuentes y cuando se den, serán más **intensos**, llegando a los 156 mm de máxima diaria en la predicción futura comparados con los 49 mm/día calculados



durante el periodo de calibración, es decir, hasta **3 veces más** cantidad en un solo día.

3. Respecto a la evaporación diaria, ésta alcanzará valores muy superiores a los actuales, llegando incluso, en periodos secos, a **uplicarse** los valores máximos diarios de evaporación de la lámina de agua, pasando de 7,42 mm/día entre 2015-2020 a 15 mm/día según el modelo predictivo.

## 5. BIBLIOGRAFÍA

- ✓ Acreman, M, Casier, R y Salathe, T. (2021). “*Report on the Joint WHC / IUCN / RAMSAR Reactive monitoring mission to Doñana National Park, Spain (25-28 February 2020).*” UNESCO World Heritage Centre.
- ✓ Clemente, Luis & Siljeström, Patricia & Rodríguez-Ramírez, Antonio. (1997). “*Relación suelo/geomorfología en el Parque Nacional de Doñana. Cuaternario y Geomorfología. 11.*” Cuaternario y Geomorfología 11(1-2): 33-41 (1997)
- ✓ Custodio, Emilio., Manzano, Marisol., & Montes del Olmo, Carlos. (2009). “*Las aguas subterráneas en Doñana aspectos ecológicos y sociales.*” Ed. Consejería de Medio Ambiente de la Junta de Andalucía
- ✓ De Groot, R., Stuip, M., Finlayson, M., y Davidson, N., 2006. “*Valuing wetlands: guidance for valuing the benefits derived from wetland ecosystem services.*” Ramsar Technical Report No. 3 CBD Technical Series No. 27
- ✓ Díaz-Paniagua, C., & Aguilar Alba, M. (2015). “*El sistema de lagunas temporales de Doñana, una red de hábitats acuáticos singulares.*” Organismo Autónomo Parques Nacionales. Ministerio de agricultura, alimentación y medio ambiente.
- ✓ Fernández-Ayuso,A, Rodríguez-Rodríguez,M, Moral, F y Caro, R, (2020); “*Monitorización Hidrológica y Caracterización de La Relación Laguna-Acuífero En Las Lagunas de Los Mantos Eólicos de Doñana*” Sociedad Geologica Española (SGE). Geoceta, 67
- ✓ Fernández Ayuso, A. (2019). “*Surface Water-Groundwater interactions in sand dune ponds located in Doñana National Park.*” PhD Thesis 2019, Universidad Pablo de Olavide.





- ✓ Fernández-Ayuso, A., Rodríguez-Rodríguez, M., & Benavente-Herrera, J. (2019). *“Assessment of the hydrological status of Doñana dune ponds: a natural World Heritage Site under threat.”* Hydrological Sciences Journal, 63(15-16)
- ✓ Cifuentes, V.J. (2021). *“Informe del estado de los acuíferos de Doñana”* Confederación Hidrográfica del Guadalquivir. Ministerio para la transición ecológica y el reto demográfico. (10-12)
- ✓ IGME. Instituto Geológico y Minero de España. Web Site Oficial España. (n.d.). (Actualizado Junio 19, 2022) de <https://www.igme.es/>
- ✓ McMahon, T. A., Peel, M. C., Lowe, L., Srikanthan, R., & McVicar, T. R. (2013). *“Estimating actual, potential, reference crop and pan evaporation using standard meteorological data.”* A pragmatic synthesis. Hydrology and Earth System Sciences, 17(4), 1331–1363.
- ✓ Plataforma sobre Adaptación al Cambio Climático en España (n.d.). (Actualizado: junio 20, 2022) de [https:// www. https://www.adaptecca.es/](https://www.adaptecca.es/)
- ✓ Red de Información Agroclimática de Andalucía (RIA) / *Instituto de Investigación y Formación Agraria y Pesquera (IFAPA)*. (n.d.). (Actualizado; Junio 20, 2022) de [https://www.juntadeandalucia.es/agriculturaypesca/ifapa/riaweb/web/inicio\\_estaciones](https://www.juntadeandalucia.es/agriculturaypesca/ifapa/riaweb/web/inicio_estaciones)
- ✓ Rodríguez-Rodríguez, M., Fernández-Ayuso, A., & Moral, F. (2017). *“Introducción Cuantificación de los aportes hídricos subterráneos a la laguna de Santa Olalla a partir de balances hídricos diarios (Parque Nacional de Doñana, Huelva).”* Sociedad Geológica Española (SGE). Geogaceta, 61.



Supplement: s1 [file s1]
